# Supplementary material
Source: Research Square preprint supplement (doi:10.21203/rs.3.rs-9831091/v1)
Supplement: Supplementary file 1 [file 8c5520989e2c199223267a9b.docx]

## Supplementary Table 1. Longitudinal clinical and biomarker changes

| **Parameter** | **Time point** | **HBP** | **LBBP** | **p-value** |
| --- | --- | --- | --- | --- |
| **NYHA class** | Implant | 2.6 ± 0.5, n=75 | 2.7 ± 0.6, n=92 | 0.245 |
| 6 months | 1.8 ± 0.6, n=73 | 1.6 ± 0.5, n=90 | 0.042 |
| 12 months | 1.7 ± 0.5, n=72 | 1.4 ± 0.5, n=88 | 0.015 |
| **NT-proBNP, pg/mL** | Implant | 109.3 (66.4–388.4), n=75 | 122.4 (64.4–435.0), n=92 | 0.542 |
| 6 months | 85.5 (55.0–210.0), n=73 | 82.0 (50.0–190.0), n=90 | 0.380 |
| 12 months | 88.0 (58.0–225.0), n=72 | 78.5 (48.0–185.0), n=88 | 0.045 |

Table note:

Values are presented as mean ± standard deviation for NYHA class and median (interquartile range) for NT-proBNP. P-values represent between-group comparisons at each time point. Comparisons were performed using the independent-samples t-test or Mann–Whitney U test, as appropriate. Device and clinical follow-up data were available in 75, 73, and 72 patients in the HBP group and in 92, 90, and 88 patients in the LBBP group at implantation, 6 months, and 12 months, respectively. NYHA, New York Heart Association; NT-proBNP, N-terminal pro–B-type natriuretic peptide; HBP, His bundle pacing; LBBP, left bundle branch pacing.
